# Supplementary material
Source: publisher site journal article supplement (https://www.dovepress.com/article/486011)
Supplement: Supplementary file 1 [file get_supplementary_file.php]

**Supplementary Tables**

**Supplementary Table1**

Correlation between the PET results and C4b or C2 levels in serum by Pearson 's correlation coefficient

| Parameters | Concentration | D/P Cr | | D/D0 | | 4h ultrafiltration volume | |
| --- | --- | --- | --- | --- | --- | --- | --- |
|  |  | *p* | *r* | *p* | *r* | *p* | *r* |
| C2(μg/ml) | 36.93±28.99 | 0.18 | 0.18 | 0.22 | -0.16 | 0.42 | -0.11 |
| C4b(μg/ml) | 322.2±191.2 | 0.23 | 0.16 | 0.44 | -0.16 | 0.76 | -0.10 |

**Supplementary Table2**

Correlation between the effluent complement Ar and overnight glucose exposure levels by Pearson 's correlation coefficient

| Parameters | Glucose exposure [g / m 2 / overnight] | |
| --- | --- | --- |
|  | *p* | *r* |
| Masp-1 Ar | 0.41 | -0.073 |
| C1q Ar | 0.96 | 0.005 |
| Masp-2 Ar | 0.60 | -0.046 |
| M-Flicolin Ar | 0.53 | 0.056 |
| H-Flicolin Ar | 0.39 | -0.076 |
| L-Flicolin Ar | <0.001 | -0.335 |
| C2 Ar | 0.32 | 0.089 |
| C4b Ar | 0.12 | -0.149 |
